# Supplementary material for: Meta-Analysis of Pollen Limitation Reveals the Relevance of Pollination Generalization in the Atlantic Forest of Brazil
Source: PubMed Central journal article supplement (PMC3931788; doi:10.1371/journal.pone.0089498), 2014-02-21
Supplement: pone.0089498.s002.pdf [file pone.0089498.s002.pdf]

**Table S1. Data, location (longitude and latitude), and reference for the studies included in this review.** Percentage of fruit set after hand cross-pollination (CP) and natural pollination (NP), effect size ( $d$ ), variance ( $v$ ), and 95% confidence interval (95% CI) for 132 species in the Atlantic forest of Brazil.

| Family       | Species                            | CP     | NP    | $d$   | $v$  | 95% CI       | Longitude  | Latitude   | Reference                |
|--------------|------------------------------------|--------|-------|-------|------|--------------|------------|------------|--------------------------|
| Acanthaceae  | <i>Geissomeria perbracteosa</i>    | 61.54  | 70.00 | -0.21 | 0.08 | -1.18, 0.76  | -46.933333 | -22.841667 | Pereira 1998             |
| Acanthaceae  | <i>Justicia sebastianopolitana</i> | 33.33  | 32.10 | 0.03  | 0.05 | -0.34, 0.40  | -44.600000 | -22.450000 | Wolowski 2013            |
| Acanthaceae  | <i>Odontonema barbelerioides</i>   | 27.78  | 11.76 | 0.58  | 0.06 | 0.04, 1.13   | -44.600000 | -22.450000 | Wolowski 2013            |
| Acanthaceae  | <i>Ruellia brevifolia</i>          | 90.32  | 56.10 | 1.10  | 0.12 | 0.36, 1.84   | -49.116667 | -22.783333 | Sigrist and Sazima 2002  |
| Acanthaceae  | <i>Ruellia menthoides</i>          | 100.00 | 66.67 | 0.89  | 0.03 | -0.79, 2.57  | -42.858611 | -20.801944 | Lima and Vieira 2006     |
| Acanthaceae  | <i>Ruellia subsessilis</i>         | 85.71  | 62.07 | 0.72  | 0.13 | -0.21, 1.64  | -42.858611 | -20.801944 | Lima and Vieira 2006     |
| Acanthaceae  | <i>Staurogyne itatiaiae</i>        | 27.27  | 44.34 | -0.42 | 0.28 | -0.80, -0.03 | -44.600000 | -22.450000 | Wolowski 2013            |
| Alismataceae | <i>Echinodorus longipetalus</i>    | 98.33  | 90.46 | 1.01  | 0.03 | -0.08, 2.10  | -48.498056 | -21.745556 | Pansarin 2008a           |
| Annonaceae   | <i>Anaxagorea dolichocarpa</i>     | 22.22  | 15.31 | 0.25  | 0.03 | -0.39, 0.90  | -34.990278 | -7.798056  | Braun 2010               |
| Apocynaceae  | <i>Oxypetalum mexiae</i>           | 10.71  | 0.49  | 0.13  | 0.40 | -0.60, 0.87  | -42.875000 | -20.750000 | Vieira and Grabalos 2003 |
| Apocynaceae  | <i>Prestonia coalita</i>           | 66.67  | 21.88 | 3.31  | 0.18 | 2.45, 4.17   | -47.116667 | -22.833333 | Franco 1991              |
| Apocynaceae  | <i>Prestonia riedelli</i>          | 16.22  | 6.98  | -0.20 | 0.09 | -0.87, 0.46  | -47.116667 | -22.833333 | Franco 1991              |
| Apocynaceae  | <i>Rauvolfia grandiflora</i>       | 12.50  | 8.63  | 0.36  | 0.12 | -0.51, 1.22  | -34.875000 | -8.125000  | Lopes and Machado 1999   |
| Boraginaceae | <i>Cordia multispicata</i>         | 52.73  | 47.92 | 0.11  | 0.18 | -0.14, 0.36  | -34.875000 | -8.125000  | Machado and Loiola 2000  |
| Bromeliaceae | <i>Aechmea nudicaulis</i>          | 62.07  | 35.85 | 0.59  | 0.03 | 0.25, 0.94   | -44.600000 | -22.450000 | Wolowski 2013            |
| Bromeliaceae | <i>Aechmea vanhoutteana</i>        | 91.67  | 94.00 | -0.19 | 0.07 | -0.53, 0.14  | -44.600000 | -22.450000 | Wolowski 2013            |
| Bromeliaceae | <i>Araeococcus parviflorus</i>     | 30.00  | 23.05 | 0.20  | 0.09 | -0.33, 0.73  | -35.841667 | -8.711667  | Siqueira Filho 2003      |

**Table S1.** Continued.

| Family        | Species                           | CP    | NP     | <i>d</i> | <i>v</i> | 95% CI       | Longitude  | Latitude   | Reference              |
|---------------|-----------------------------------|-------|--------|----------|----------|--------------|------------|------------|------------------------|
| Bromeliaceae  | <i>Billbergia distachia</i>       | 86.96 | 80.22  | 0.27     | 0.05     | -0.28, 0.83  | -44.600000 | -22.450000 | Wolowski 2013          |
| Bromeliaceae  | <i>Nidularium itatiaiae</i>       | 82.05 | 48.45  | 0.87     | 0.03     | 0.57, 1.18   | -44.600000 | -22.450000 | Wolowski 2013          |
| Bromeliaceae  | <i>Pitcairnia flammaea</i>        | 92.68 | 81.62  | 0.58     | 0.04     | 0.06, 1.09   | -44.600000 | -22.450000 | Wolowski 2013          |
| Bromeliaceae  | <i>Quesnelia augusto-coburgii</i> | 60.32 | 60.78  | -0.01    | 0.05     | -0.36, 0.34  | -44.600000 | -22.450000 | Wolowski 2013          |
| Bromeliaceae  | <i>Quesnelia lateralis</i>        | 80.00 | 44.00  | 0.90     | 0.13     | -0.01, 1.81  | -42.516667 | -22.408333 | Martinelli 1997        |
| Bromeliaceae  | <i>Tillandsia geminiflora</i>     | 95.65 | 29.41  | 2.19     | 0.03     | 0.94, 3.43   | -44.600000 | -22.450000 | Wolowski 2013          |
| Bromeliaceae  | <i>Vriesea ensiformis</i>         | 70.00 | 26.74  | 1.02     | 0.31     | 0.23, 1.81   | -47.250000 | -24.500000 | Araujo et al. 1994     |
| Bromeliaceae  | <i>Vriesea carinata</i>           | 75.00 | 31.25  | 1.04     | 0.11     | -0.25, 2.33  | -47.250000 | -24.500000 | Araujo et al. 1994     |
| Bromeliaceae  | <i>Vriesea gradata</i>            | 36.36 | 9.72   | 0.92     | 0.07     | 0.38, 1.46   | -44.600000 | -22.450000 | Wolowski 2013          |
| Bromeliaceae  | <i>Vriesea heterostachys</i>      | 66.67 | 64.00  | 0.06     | 0.16     | -0.92, 1.05  | -42.516667 | -22.408333 | Martinelli 1997        |
| Bromeliaceae  | <i>Vriesea hydrophora</i>         | 50.00 | 55.00  | -0.11    | 0.68     | -0.95, 0.73  | -42.516667 | -22.408333 | Martinelli 1997        |
| Bromeliaceae  | <i>Vriesea longicaulis</i>        | 50.00 | 36.59  | 0.30     | 0.15     | -0.29, 0.90  | -44.600000 | -22.450000 | Wolowski 2013          |
| Bromeliaceae  | <i>Vriesea longiscapa</i>         | 60.00 | 86.00  | -0.78    | 0.26     | -1.60, 0.05  | -42.516667 | -22.408333 | Martinelli 1997        |
| Bromeliaceae  | <i>Vriesea sparsiflora</i>        | 57.14 | 54.00  | 0.07     | 0.09     | -0.59, 0.73  | -42.516667 | -22.408333 | Martinelli 1997        |
| Campanulaceae | <i>Lobelia thapsoidea</i>         | 76.32 | 100.00 | -1.77    | 0.09     | -3.36, -0.18 | -42.658333 | -22.275000 | Mello 2004             |
| Campanulaceae | <i>Siphocampylus humilis</i>      | 86.67 | 40.00  | 1.26     | 0.11     | 0.32, 2.19   | -42.658333 | -22.275000 | Mello 2004             |
| Clusiaceae    | <i>Clusia nemorosa</i>            | 88.61 | 85.39  | 0.16     | 0.04     | -0.34, 0.66  | -34.875000 | -8.125000  | Lopes and Machado 1998 |
| Clusiaceae    | <i>Vismia guianensis</i>          | 60.00 | 40.00  | 0.45     | 0.05     | -0.05, 0.94  | -34.875000 | -8.125000  | Lopes and Machado 1998 |
| Commelinaceae | <i>Dichorisandra hexandra</i>     | 65.63 | 18.18  | 1.19     | 0.13     | 0.60, 1.77   | -47.116667 | -22.816667 | Sigrist 1992           |
| Commelinaceae | <i>Dichorisandra incurva</i>      | 31.82 | 43.40  | -0.27    | 0.07     | -0.85, 0.30  | -47.116667 | -22.816667 | Sigrist 1992           |
| Euphorbiaceae | <i>Croton floribundus</i>         | 73.08 | 30.65  | 1.00     | 0.09     | 0.60, 1.40   | -47.109167 | -22.829167 | Passos 1995            |
| Euphorbiaceae | <i>Croton priscus</i>             | 35.00 | 27.14  | 0.20     | 0.64     | -0.21, 0.62  | -47.109167 | -22.829167 | Passos 1995            |

**Table S1.** Continued.

| Family        | Species                              | CP     | NP    | <i>d</i> | <i>v</i> | 95% CI      | Longitude  | Latitude   | Reference                           |
|---------------|--------------------------------------|--------|-------|----------|----------|-------------|------------|------------|-------------------------------------|
| Euphorbiaceae | <i>Dalechampia stipulacea</i>        | 100.00 | 33.33 | 2.64     | 0.10     | 1.02, 4.26  | -47.100000 | -23.816667 | Sazima and Sazima 1985              |
| Fabaceae      | <i>Caesalpinia echinata</i>          | 41.03  | 9.17  | 1.06     | 0.02     | 0.71, 1.42  | -35.194444 | -8.039722  | Borges et al. 2009                  |
| Fabaceae      | <i>Canavalia picta</i>               | 32.56  | 40.82 | -0.20    | 0.18     | -0.67, 0.27 | -47.109167 | -22.829167 | Franco 1995                         |
| Fabaceae      | <i>Dioclea rufescens</i>             | 36.54  | 18.95 | 0.50     | 0.11     | 0.14, 0.86  | -47.109167 | -22.829167 | Franco 1995                         |
| Fabaceae      | <i>Inga ingoides</i>                 | 10.00  | 14.97 | -0.25    | 0.21     | -0.96, 0.45 | -35.866667 | -9.000000  | Cruz Neto 2007                      |
| Fabaceae      | <i>Inga striata</i>                  | 6.67   | 1.14  | 1.01     | 0.40     | 0.17, 1.84  | -35.866667 | -9.000000  | Cruz Neto 2007                      |
| Fabaceae      | <i>Inga vera</i>                     | 20.00  | 1.92  | 1.40     | 0.16     | 0.87, 1.94  | -35.866667 | -9.000000  | Cruz Neto 2007                      |
| Fabaceae      | <i>Mucuna japura</i>                 | 36.36  | 2.71  | 1.67     | 0.04     | 1.30, 2.04  | -44.833333 | -23.350000 | Agostini 2008                       |
| Fabaceae      | <i>Mucuna urens</i>                  | 73.53  | 11.01 | 1.72     | 0.08     | 1.27, 2.16  | -44.833333 | -23.350000 | Agostini 2008                       |
| Fabaceae      | <i>Pseudopiptadenia contorta</i>     | 22.73  | 25.00 | -0.07    | 0.07     | -0.75, 0.61 | -42.283333 | -22.525000 | Pires and Freitas 2008              |
| Fabaceae      | <i>Pseudopiptadenia leptostachya</i> | 16.67  | 28.00 | -0.37    | 0.12     | -1.20, 0.47 | -42.283333 | -22.525000 | Pires and Freitas 2008              |
| Fabaceae      | <i>Senna multijuga</i>               | 52.88  | 14.44 | 1.04     | 0.06     | 0.66, 1.43  | -44.600000 | -22.450000 | Wolowski and Freitas 2010           |
| Fabaceae      | <i>Swartzia pickelii</i>             | 5.88   | 0.25  | 1.78     | 0.07     | 1.07, 2.49  | -34.875000 | -8.125000  | Lopes and Machado 1996              |
| Fabaceae      | <i>Vigna candida</i>                 | 70.00  | 68.24 | 0.05     | 0.66     | -0.74, 0.83 | -47.109167 | -22.829167 | Franco 1995                         |
| Gentianaceae  | <i>Irlbachia alata</i>               | 100.00 | 93.94 | 0.14     | 0.04     | -1.47, 1.76 | -34.933333 | -8.016667  | Machado et al. 1998                 |
| Gesneriaceae  | <i>Besleria longimucronata</i>       | 45.45  | 30.00 | 0.37     | 0.00     | -0.63, 1.36 | -44.833333 | -23.366667 | San-Martin Gajardo and Freitas 1999 |
| Gesneriaceae  | <i>Nematanthus crassifolius</i>      | 57.89  | 73.68 | -0.39    | 0.03     | -0.99, 0.21 | -44.600000 | -22.450000 | Wolowski 2013                       |
| Gesneriaceae  | <i>Nematanthus fornix</i>            | 75.00  | 16.67 | 1.49     | 0.12     | 0.15, 2.83  | -44.600000 | -22.450000 | Wolowski 2013                       |
| Gesneriaceae  | <i>Nematanthus lanceolatus</i>       | 45.45  | 44.44 | 0.02     | 0.04     | -0.57, 0.61 | -44.600000 | -22.450000 | Wolowski 2013                       |

**Table S1.** Continued.

| Family        | Species                         | CP    | NP    | <i>d</i> | <i>v</i> | 95% CI      | Longitude  | Latitude   | Reference                 |
|---------------|---------------------------------|-------|-------|----------|----------|-------------|------------|------------|---------------------------|
| Gesneriaceae  | <i>Sinningia cooperi</i>        | 87.50 | 42.55 | 1.24     | 0.07     | 0.58, 1.90  | -44.600000 | -22.450000 | Wolowski 2013             |
| Gesneriaceae  | <i>Sinningia eumorpha</i>       | 61.54 | 69.23 | -0.19    | 0.14     | -0.82, 0.44 | -47.933333 | -22.400000 | San-Martin Gajardo 2004   |
| Gesneriaceae  | <i>Sinningia gigantifolia</i>   | 57.14 | 8.33  | 1.48     | 0.12     | 0.60, 2.36  | -44.600000 | -22.450000 | Wolowski 2013             |
| Gesneriaceae  | <i>Sinningia schiffneri</i>     | 50.00 | 44.44 | 0.12     | 0.13     | -0.44, 0.69 | -46.321944 | -23.778056 | San-Martin Gajardo 2004   |
| Gesneriaceae  | <i>Sinningia tuberosa</i>       | 47.06 | 38.89 | 0.18     | 0.01     | -0.56, 0.92 | -43.883333 | -21.700000 | San-Martin Gajardo 2004   |
| Gesneriaceae  | <i>Vanhouttea brueggeri</i>     | 45.00 | 43.33 | 0.04     | 0.05     | -0.59, 0.67 | -43.883333 | -21.700000 | San-Martin Gajardo 2004   |
| Gesneriaceae  | <i>Vanhouttea calcarata</i>     | 50.00 | 60.00 | -0.22    | 0.19     | -1.11, 0.67 | -43.016667 | -22.450000 | San-Martin Gajardo 2004   |
| Gesneriaceae  | <i>Vanhouttea hilariana</i>     | 52.17 | 66.67 | -0.33    | 0.42     | -0.98, 0.32 | -43.883333 | -21.700000 | San-Martin Gajardo 2004   |
| Lamiaceae     | <i>Salvia sellowiana</i>        | 51.72 | 38.98 | 0.29     | 0.19     | -0.21, 0.78 | -44.600000 | -22.450000 | Wolowski 2013             |
| Malpighiaceae | <i>Banisteriopsis adenopoda</i> | 16.67 | 8.89  | 0.40     | 0.22     | 0.05, 0.74  | -47.116667 | -22.816667 | Sigrist and Sazima 2004   |
| Malpighiaceae | <i>Banisteriopsis muricata</i>  | 38.10 | 2.78  | 1.69     | 0.11     | 0.97, 2.41  | -47.116667 | -22.816667 | Sigrist and Sazima 2004   |
| Malpighiaceae | <i>Byrsonima sericea</i>        | 47.95 | 10.86 | 1.12     | 0.19     | 0.82, 1.41  | -34.875000 | -8.125000  | Teixeira and Machado 2000 |
| Malpighiaceae | <i>Dicella bracteosa</i>        | 5.26  | 0.00  | 0.84     | 0.08     | -0.89, 2.56 | -47.116667 | -22.816667 | Sigrist and Sazima 2004   |
| Malpighiaceae | <i>Mascagnia anisopetala</i>    | 3.28  | 4.04  | -0.12    | 0.03     | -0.71, 0.47 | -47.116667 | -22.816667 | Sigrist and Sazima 2004   |

**Table S1.** Continued.

| Family          | Species                          | CP    | NP    | <i>d</i> | <i>v</i> | 95% CI       | Longitude  | Latitude   | Reference                    |
|-----------------|----------------------------------|-------|-------|----------|----------|--------------|------------|------------|------------------------------|
| Malpighiaceae   | <i>Mascagnia cordifolia</i>      | 42.86 | 0.00  | 2.45     | 0.09     | 0.88, 4.02   | -47.116667 | -22.816667 | Sigrist and Sazima 2004      |
| Malpighiaceae   | <i>Stigmaphyllon lalandianum</i> | 7.62  | 4.94  | 0.25     | 0.05     | -0.30, 0.81  | -47.116667 | -22.816667 | Sigrist and Sazima 2004      |
| Malvaceae       | <i>Abutilon bedfordianum</i>     | 72.41 | 34.64 | 0.88     | 1.22     | 0.56, 1.20   | -44.600000 | -22.450000 | Wolowski 2013                |
| Marantaceae     | <i>Calathea cylindrica</i>       | 35.14 | 40.00 | -0.11    | 0.19     | -0.64, 0.41  | -43.216667 | -22.966667 | Barreto and Freitas 2007     |
| Marantaceae     | <i>Calathea villosa</i>          | 20.00 | 30.77 | -0.32    | 0.42     | -1.00, 0.37  | -35.183333 | -8.016667  | Teixeira 2005                |
| Marantaceae     | <i>Hylaeanthus hexantha</i>      | 60.00 | 86.67 | -0.81    | 0.21     | -1.51, -0.10 | -35.183333 | -8.016667  | Teixeira 2005                |
| Melastomataceae | <i>Leandra dasytricha</i>        | 55.17 | 45.71 | 0.21     | 0.09     | -0.34, 0.75  | -46.983333 | -23.266667 | Goldenberg and Varassin 2001 |
| Melastomataceae | <i>Leandra regnellii</i>         | 85.71 | 68.75 | 0.55     | 0.09     | -0.20, 1.31  | -46.983333 | -23.266667 | Goldenberg and Varassin 2001 |
| Melastomataceae | <i>Miconia ciliata</i>           | 60.00 | 76.00 | -0.41    | 0.10     | -0.89, 0.06  | -34.875000 | -8.062500  | Melo and Machado 1998        |
| Melastomataceae | <i>Miconia elegans</i>           | 43.28 | 30.12 | 0.31     | 0.14     | 0.19, 0.44   | -47.116667 | -22.833333 | Borges 1991                  |
| Melastomataceae | <i>Miconia pusilliflora</i>      | 20.16 | 15.04 | 0.20     | 0.04     | 0.02, 0.37   | -46.983333 | -23.266667 | Goldenberg and Varassin 2001 |
| Melastomataceae | <i>Tibouchina cerastifolia</i>   | 67.39 | 58.73 | 0.21     | 0.23     | -0.23, 0.64  | -48.987778 | -25.433889 | Franco 2007                  |
| Melastomataceae | <i>Tibouchina clinopodifolia</i> | 96.67 | 73.33 | 1.30     | 0.07     | 0.03, 2.57   | -48.987778 | -25.433889 | Franco 2007                  |
| Melastomataceae | <i>Tibouchina gracilis</i>       | 89.74 | 93.75 | -0.30    | 0.06     | -1.16, 0.56  | -48.987778 | -25.433889 | Franco 2007                  |
| Melastomataceae | <i>Tibouchina sellowiana</i>     | 80.00 | 76.47 | 0.11     | 0.04     | -0.63, 0.86  | -46.983333 | -23.266667 | Goldenberg and Varassin 2001 |
| Melastomataceae | <i>Tibouchina semidecandra</i>   | 62.50 | 58.33 | 0.10     | 0.68     | -0.62, 0.81  | -46.983333 | -23.266667 | Goldenberg and Varassin 2001 |

**Table S1.** Continued.

| Family        | Species                             | CP    | NP    | <i>d</i> | <i>v</i> | 95% CI       | Longitude  | Latitude   | Reference                 |
|---------------|-------------------------------------|-------|-------|----------|----------|--------------|------------|------------|---------------------------|
| Orchidaceae   | <i>Acianthera aveniformis</i>       | 35.00 | 2.16  | 1.76     | 0.43     | 1.15, 2.38   | -49.234722 | -25.559722 | Dos Santos Filho 2007     |
| Orchidaceae   | <i>Acianthera hygrophila</i>        | 60.00 | 0.41  | 3.25     | 0.08     | 2.56, 3.94   | -49.234722 | -25.559722 | Dos Santos Filho 2007     |
| Orchidaceae   | <i>Acianthera sonderana</i>         | 70.00 | 0.20  | 3.89     | 0.25     | 2.96, 4.82   | -49.258889 | -25.490833 | Dos Santos Filho 2007     |
| Orchidaceae   | <i>Cirrhaea dependens</i>           | 68.18 | 0.90  | 3.02     | 0.02     | 2.35, 3.68   | -46.866667 | -23.183333 | Pansarin et al. 2006      |
| Orchidaceae   | <i>Corymborkis flava</i>            | 78.57 | 66.67 | 0.33     | 0.10     | -0.22, 0.89  | -42.858611 | -20.801944 | Vieira et al. 2007        |
| Orchidaceae   | <i>Elleanthus brasiliensis</i>      | 75.76 | 30.39 | 1.09     | 0.20     | 0.76, 1.41   | -44.837500 | -23.356111 | Nunes 2011                |
| Orchidaceae   | <i>Elleanthus crinipes</i>          | 64.71 | 16.73 | 1.22     | 0.08     | 0.64, 1.80   | -45.223056 | -23.435556 | Nunes 2011                |
| Orchidaceae   | <i>Epidendrum secundum</i>          | 80.00 | 7.54  | 2.15     | 0.10     | 1.69, 2.60   | -46.866667 | -23.183333 | Pansarin and Amaral 2008a |
| Orchidaceae   | <i>Gongora quinquenervis</i>        | 72.73 | 1.05  | 3.05     | 0.47     | 2.35, 3.74   | -34.953333 | -7.812500  | Martini et al. 2003       |
| Orchidaceae   | <i>Govenia utriculata</i>           | 63.33 | 10.07 | 1.51     | 0.13     | 1.00, 2.01   | -46.866667 | -23.250000 | Pansarin 2008b            |
| Orchidaceae   | <i>Grobya amherstiae</i>            | 82.00 | 33.78 | 1.21     | 0.24     | 0.80, 1.62   | -46.866667 | -23.250000 | Mickeliunas et al. 2006   |
| Orchidaceae   | <i>Polystachya estrellensis</i>     | 68.75 | 87.46 | -0.64    | 0.14     | -1.23, -0.04 | -46.866667 | -23.250000 | Pansarin and Amaral 2006  |
| Orchidaceae   | <i>Psilochilus modestus</i>         | 90.24 | 19.47 | 2.01     | 0.21     | 1.39, 2.63   | -46.866667 | -23.183333 | Pansarin and Amaral 2008b |
| Orchidaceae   | <i>Stanhopea insignis</i>           | 90.48 | 25.37 | 1.84     | 0.11     | 0.98, 2.69   | -45.066667 | -23.550000 | Pansarin and Amaral 2009  |
| Orchidaceae   | <i>Stanhopea lietzei</i>            | 65.00 | 16.85 | 1.22     | 0.06     | 0.63, 1.81   | -46.866667 | -23.183333 | Pansarin and Amaral 2009  |
| Orobanchaceae | <i>Velloziella dracocephaloides</i> | 75.00 | 46.15 | 0.69     | 0.42     | -0.60, 1.99  | -44.600000 | -22.450000 | Wolowski 2013             |

**Table S1.** Continued.

| Family         | Species                            | CP    | NP    | <i>d</i> | <i>v</i> | 95% CI      | Longitude  | Latitude   | Reference                  |
|----------------|------------------------------------|-------|-------|----------|----------|-------------|------------|------------|----------------------------|
| Passifloraceae | <i>Mitostemma glaziovii</i>        | 95.65 | 23.53 | 2.35     | 0.12     | 1.09, 3.62  | -41.066667 | -21.400000 | Benevides 2006             |
| Passifloraceae | <i>Passiflora alata</i>            | 50.00 | 27.78 | 0.53     | 0.20     | -0.36, 1.42 | -41.066667 | -21.400000 | Benevides 2006             |
| Passifloraceae | <i>Passiflora miersii</i>          | 60.00 | 51.85 | 0.18     | 0.03     | -0.89, 1.25 | -47.100000 | -22.816667 | Koschnitze and Sazima 1997 |
| Passifloraceae | <i>Passiflora suberosa</i>         | 91.67 | 52.94 | 1.26     | 0.06     | 0.01, 2.50  | -47.100000 | -22.816667 | Koschnitze and Sazima 1997 |
| Podostemaceae  | <i>Mourera fluviatillis</i>        | 88.33 | 92.50 | -0.27    | 0.10     | -0.90, 0.36 | -35.583333 | -8.550000  | Sobral-Leite et al. 2011   |
| Rubiaceae      | <i>Bathysa australis</i>           | 17.50 | 28.00 | -0.33    | 0.22     | -0.81, 0.15 | -42.283333 | -22.525    | Andrich 2008               |
| Rubiaceae      | <i>Bathysa cuspidata</i>           | 22.50 | 22.00 | 0.02     | 0.04     | -0.43, 0.46 | -44.600000 | -22.450000 | Andrich 2008               |
| Rubiaceae      | <i>Chiococca alba</i>              | 61.54 | 53.49 | 0.18     | 0.08     | -0.30, 0.67 | -44.833333 | -23.350000 | Castro et al. 2008         |
| Rubiaceae      | <i>Manettia luteo-rubra</i>        | 89.29 | 90.00 | -0.04    | 0.78     | -1.08, 1.00 | -48.533333 | -24.183333 | Passos and Sazima 1995     |
| Rubiaceae      | <i>Manettia mitis</i>              | 70.31 | 50.00 | 0.48     | 0.04     | 0.12, 0.83  | -44.600000 | -22.450000 | Wolowski 2013              |
| Rubiaceae      | <i>Palicourea longepedunculata</i> | 71.43 | 24.40 | 1.13     | 0.04     | 0.61, 1.65  | -42.858611 | -20.801944 | Silva et al. 2010          |
| Rubiaceae      | <i>Psychotria barbiflora</i>       | 59.38 | 20.38 | 0.96     | 0.09     | 0.54, 1.38  | -34.875000 | -8.125000  | Teixeira and Machado 2004a |
| Rubiaceae      | <i>Psychotria birotula</i>         | 35.21 | 40.13 | -0.12    | 0.02     | -0.44, 0.21 | -44.833333 | -23.350000 | Castro et al. 2004         |
| Rubiaceae      | <i>Psychotria brasiliensis</i>     | 56.52 | 41.77 | 0.33     | 0.14     | -0.08, 0.73 | -44.215000 | -23.182500 | Almeida 2005               |
| Rubiaceae      | <i>Psychotria mapourioides</i>     | 27.12 | 26.67 | 0.01     | 0.07     | -0.43, 0.46 | -44.833333 | -23.350000 | Castro et al. 2004         |
| Rubiaceae      | <i>Psychotria nuda</i>             | 23.53 | 20.83 | 0.12     | 0.73     | -0.22, 0.46 | -44.215000 | -23.182500 | Almeida 2005               |
| Rubiaceae      | <i>Psychotria suterella</i>        | 62.07 | 54.55 | 0.17     | 0.18     | -0.34, 0.68 | -47.000000 | -23.708333 | Lopes and Buzato 2005      |
| Rubiaceae      | <i>Psychotria tenuinervis</i>      | 12.90 | 19.57 | -0.47    | 0.06     | -1.24, 0.30 | -42.466667 | -22.833333 | Virillo et al. 2007        |
| Rubiaceae      | <i>Rudgea jasminoides</i>          | 71.08 | 49.41 | 0.51     | 0.03     | 0.16, 0.86  | -44.833333 | -23.350000 | Castro et al. 2004         |

**Table S1.** Continued.

| Family      | Species                        | CP     | NP    | <i>d</i> | <i>v</i> | 95% CI      | Longitude  | Latitude   | Reference                  |
|-------------|--------------------------------|--------|-------|----------|----------|-------------|------------|------------|----------------------------|
| Rubiaceae   | <i>Sabicea cinerea</i>         | 52.38  | 60.00 | -0.17    | 0.44     | -0.85, 0.51 | -34.875000 | -8.125000  | Teixeira and Machado 2004b |
| Rutaceae    | <i>Galipea jasminiflora</i>    | 47.52  | 3.14  | 1.84     | 0.03     | 1.43, 2.24  | -47.100000 | -22.816667 | Piedade and Ranga 1993     |
| Rutaceae    | <i>Metrodorea nigra</i>        | 25.93  | 5.88  | 0.95     | 0.13     | 0.43, 1.47  | -47.100000 | -22.816667 | Pombal and Morellato 2000  |
| Rutaceae    | <i>Metrodorea stipularis</i>   | 35.71  | 16.00 | 0.59     | 0.08     | -0.08, 1.26 | -47.100000 | -22.816667 | Pombal and Morellato 2000  |
| Solanaceae  | <i>Dysochroma viridiflora</i>  | 95.00  | 92.03 | 0.27     | 0.30     | -0.58, 1.13 | -43.316667 | -22.916667 | Verçoza 2003               |
| Verbenaceae | <i>Citharexylum myrianthum</i> | 100.00 | 0.00  | 6.21     | 0.15     | 4.04, 8.38  | -44.833333 | -23.350000 | Rocca and Sazima 2006      |
| Violaceae   | <i>Amphirrhox longifolia</i>   | 20.00  | 10.96 | 0.39     | 0.03     | -0.88, 1.66 | -34.990278 | -7.798056  | Braun 2010                 |
| Violaceae   | <i>Hybanthus atropurpureus</i> | 54.55  | 52.14 | 0.05     | 0.06     | -0.32, 0.43 | -47.109167 | -22.829722 | Rosero-Lasprilla 1997      |
| Violaceae   | <i>Paypayrola blanchetiana</i> | 8.14   | 1.04  | 1.17     | 0.07     | 0.69, 1.66  | -34.990278 | -7.798056  | Braun 2010                 |

**References**

Agostini K (2008) Ecologia da reprodução de duas espécies de *Mucuna* (Leguminosae, Faboideae, Phaseoleae) - embriologia, citogenética e variabilidade genética - do litoral norte de São Paulo. PhD Thesis, State University of Campinas, Campinas.

Almeida EM (2005) Ecologia reprodutiva e comportamento dos visitantes florais e dos frugívoros de duas espécies de *Psychotria* L. (Rubiaceae) em uma área de Floresta Atlântica, Ilha grande, Rio de Janeiro. PhD thesis, Federal University of Rio de Janeiro, Rio de Janeiro.

Andrich M (2008) Sistema reprodutivo e polinização em duas espécies arbóreas e simpátricas de *Bathysa* (Rubiaceae). Master's dissertation, Botanical Garden of Rio de Janeiro, Rio de Janeiro.

Araujo AC, Fischer EA, Sazima M (1994) Floração sequencial e polinização de três espécies de *Vriesea* (Bromeliaceae) na região de Juréia, sudeste Brasil. Rev Bras Bot 17(2): 113-118.

- Barreto AA, Freitas L (2007) Atributos florais em um sistema de polinização especializado: *Calathea cylindrica* (Roscoe) K. Schum. (Marantaceae) e abelhas Euglossini. Rev Bras Bot 30(3): 421-431.
- Benevides CR (2006) Biologia floral e polinização de Passifloraceae nativas e cultivadas na região Norte Fluminense-RJ. Master's dissertation, State University of North Fluminense, Campos dos Goytacazes.
- Borges HBN (1991) Biologia reprodutiva de quatro espécies de Melastomataceae. Master's dissertation thesis, State University of Campinas, Campinas.
- Borges LA, Sobrinho MS, Lopes AV (2009) Phenology, pollination, and breeding system of the threatened tree *Caesalpinia echinata* Lam. (Fabaceae), and a review of studies on here productive biology in the genus. Flora 204(2): 111-130.
- Braun M (2010) Floral biology, breeding system, pollination and reproductive success of selected understory tree species in fragments of Atlantic Rainforest in Pernambuco, Northeast Brazil. PhD thesis, University of Ulm, Ulm.
- Castro CC, Oliveira PEAM, Alves MC (2004) Breeding system and floral morphometry of distylous *Psychotria* L. species in the Atlantic Rain Forest, SE Brazil. Plant Biology 6(6): 755-760.
- Castro CC, Oliveira PEAM, Pimentel RMM (2008) Reproductive biology of the herkogamous vine *Chiococca alba* (L.) Hitchc. (Rubiaceae) in the Atlantic Rain Forest, SE Brazil. Rev Bras Bot 31(2): 317-321.
- Dos Santos Filho JF (2007) Polinização e biologia reprodutiva de três espécies do gênero *Acianthera* Scheidw. (Orchidaceae) em floresta ombrófila mista. Master's dissertation, Federal University of Parana, Curitiba.
- Franco ALM (1991) Biologia floral de duas espécies sincronopátricas de *Prestonia* (Apocynaceae). Master's dissertation thesis, State University of Campinas, Campinas.
- Franco ALM (1995) Ecologia da polinização e biologia reprodutiva de sete espécies de Phaseoleae (Fabaceae). PhD thesis, State University of Campinas, Campinas.
- Franco AM (2007) Biologia reprodutiva de três espécies de Melastomataceae (*Tibouchina cerastifolia* Cong., *T. clinopodifolia* Cong. E *T. gracilis* Cong.) nos mananciais da serra, Piraquara, Paraná. Master's dissertation, Federal University of Parana, Curitiba.
- Goldenberg R, Varassin IG (2001) Sistemas reprodutivos de espécies de Melastomataceae da Serra do Japi. Jundiá. São Paulo. Brasil. Rev Bras Bot 24(3): 283-288.
- Koschnitze C, Sazima M (1997) Biologia floral de cinco espécies de *Passiflora* L. (Passifloraceae) em mata semidecídua. Rev Bras Bot 20(2): 119-126.
- Lima NAS, Vieira MF (2006) Fenologia de floração e sistema reprodutivo de três espécies de *Ruellia* (Acanthaceae) em fragmento florestal de Viçosa, sudeste

brasileiro. Rev Bras Bot 29(4): 681-687.

Lopes AV, Machado IC (1998). Floral biology and reproductive ecology of *Clusia nemorosa* (Clusiaceae) in northeastern Brazil. Plant Syst Evol 213: 71-90.

Lopes AV, Machado IC (1999) Pollination and reproductive biology of *Rauvolfia grandiflora* (Apocynaceae): secondary pollen presentation, herkogamy and self-incompatibility. Plant Biology 1(5): 547-553.

Lopes AVF, Machado ICS (1996) Biologia floral de *Swartzia pickelii* Killip ex Ducke (Leguminosae - Papilionoideae) e sua polinização por *Eulaema* spp. (Apidae - Euglossini). Rev Bras Bot 19(1): 17-24.

Lopes LE, Buzato S (2005) Biologia reprodutiva de *Psychotria suterella* Muell. Arg. (Rubiaceae) e a abordagem de escalas ecológicas para a fenologia de floração e frutificação. Rev Bras Bot 28(4): 785-795.

Machado IC, Loiola MI (2000) Fly pollination and pollinator sharing in two synchronopatric species: *Cordia multispicata* (Boraginaceae) and *Borreria alata* (Rubiaceae). Rev Bras Bot 23(3): 305-311.

Machado ICS, Sazima I, Sazima M (1998) Bat pollination of the terrestrial herb *Irlbachia alata* (Gentianaceae) in northeastern Brazil. Plant Syst Evol 209(3-4): 231-237.

Martinelli G (1997) Biologia reprodutiva de Bromeliaceae na Reserva Ecológica de Macaé de Cima. In: de Lima HC, Guedes-Bruni RR, editors. Serra da Macaé de Cima: Diversidade Florística e Conservação da Mata Atlântica. Rio de Janeiro: Jardim Botânico do Rio de Janeiro. pp. 213-250.

Martini P, Schlindwein C, Montenegro A (2003) Pollination flower longevity and reproductive biology of *Gongora quinquenervis* Ruiz and Pavon (Orchidaceae) in an Atlantic Forest fragment of Pernambuco, Brazil. Plant Biology 5(5): 496-503.

Mello RB (2004) Biologia da reprodução de duas espécies de Campanulaceae Jussieu em Nova Friburgo, RJ. Master's dissertations, Federal University of Rio de Janeiro, Rio de Janeiro.

Melo GFA, Machado IC (1998) Autoincompatibilidade em *Miconia ciliata* (L.C.Rich) Dc. (Miconieae-Melastomataceae). Acta Bot Bras 12: 113-120.

Mickeliunas L, Pansarin ER, Sazima M (2006) Biologia floral, melitofilia e influência de besouros Curculionidae no sucesso reprodutivo de *Grobya amherstiae* Lindl. (Orchidaceae: Cyrtopodinae). Rev Bras Bot 29(2): 251-258.

Nunes CEP (2011) Biologia da polinização e reprodução de *Elleanthus* C.Presl. (Orchidaceae) na Mata Atlântica do Parque Estadual da Serra do Mar, São Paulo. Master's dissertation, State University of Campinas, Campinas.

Cruz Neto O (2007) Fenologia, biologia reprodutiva, eficiência dos visitantes florais de espécies simpátricas de *Inga* (Leguminosae - Mimosoideae) em remanescente de Floresta Atlântica no nordeste do Brasil. Master's dissertation, Federal University of Pernambuco, Recife.

- Pansarin ER, Amaral MCE (2006) Biologia reprodutiva e polinização de duas espécies de *Polystachya* Hook. no Sudeste do Brasil: evidência de pseudocleistogamia em Polystachyeae (Orchidaceae). *Rev Bras Bot* 29(3): 423-432.
- Pansarin ER, Bittrich V, Amaral MCE (2006) At daybreak - Reproductive biology and isolating mechanisms of *Cirrhaea dependens* (Orchidaceae). *Plant Biology* 8(4): 494-502.
- Pansarin ER (2008a) Reproductive biology of *Echinodorus longipetalus* (Alismataceae): sexual morphs, breeding system and pollinators. *Aquat Bot* 89(4): 404-408.
- Pansarin ER (2008b) Reproductive biology and pollination of *Govenia utriculata*: A syrphid fly orchid pollinated through a pollen-deceptive mechanism. *Plant Spec Biol* 23(2): 90-96.
- Pansarin ER, Amaral MCE (2008a) Reproductive biology and pollination mechanisms of *Epidendrum secundum* (Orchidaceae). Floral variation: a consequence of natural hybridization? *Plant Biology* 10(2): 211-219.
- Pansarin ER, Amaral MCE (2008b) Pollen and nectar as a reward in the basal epidendroid *Psilochilus modestus* (Orchidaceae: Triphoreae): A study of floral morphology. reproductive biology and pollination strategy. *Flora* 203: 474-483.
- Pansarin ER, Amaral MCE (2009) Reproductive biology and pollination of southeastern Brazilian *Stanhopea* Frost ex Hook. (Orchidaceae). *Flora* 204(3): 238-249.
- Passos LC (1995) Fenologia, polinização e reprodução de duas espécies de *Croton* (Euphorbiaceae) em Mata Semidecídua. Master's dissertation, State University of Campinas, Campinas.
- Passos L, Sazima M (1995) Reproductive biology of the distylous *Manettia luteo-rubra* (Rubiaceae). *Bot Acta* 108(4): 309-313.
- Pereira MFPA (1998) Biologia da polinização de duas espécies de Acanthaceae, na região de Campinas, São Paulo. Master's dissertation, State University of Campinas, Campinas.
- Piedade LH, Ranga NT (1993) Ecologia da Polinização de *Galipea jasminiflora* Engler (Rutaceae). *Rev Bras Bot* 16(2): 151-157.
- Pires JPA, Freitas L (2008) Reproductive biology of two tree species of Leguminosae in a Montane Rain Forest in southeastern Brazil. *Flora* 203(6): 491-498.
- Pombal ECP, Morellato LPC (2000) Differentiation of floral color and odor in two fly pollinated species of *Metrodorea* (Rutaceae) from Brazil. *Plant Syst Evol* 221(3-4): 141-156.
- Rocca M, Sazima M (2006) The dioecious, sphingophilous species *Citharexylum myrianthum* (Verbenaceae): Pollination and visitor diversity. *Flora* 201(6): 440-450.

- Rosero-Lasprilla L (1997) Biologia reprodutiva de *Hybanthus atropurpureus* (St. Hil.) Taub. da Reserva Municipal de Santa Genebra, Sudeste Brasil. Master's dissertation, State University of Campinas, Campinas.
- San-Martin Gajardo I, Freitas L (1999) Hummingbird pollination in *Besleria longimucronata* Hoehne (Gesneriaceae) in Southeastern Brazil. *Biociências* 7: 13-24.
- San-Martina Gajardo I (2004) Biologia da polinização de espécies da tribo Sinningieae (Gesneriaceae) no sudeste do Brasil. PhD thesis, State University of Campinas, Campinas.
- Sazima M, Sazima I (1985) Biologia floral de *Dalechampia stipulacea* (Euphorbiaceae) e sua polinização por *Euglossa melanotricha* (Apidae). *Rev Bras Bot* 45(1/2): 85-93.
- Sigrist MR, Sazima M (2002) *Ruellia brevifolia* (Pohl) Ezcurra (Acanthaceae): fenologia da floração. biologia da polinização e reprodução. *Rev Bras Bot* 25(1): 35-42.
- Sigrist MR, Sazima M (2004) Pollination and reproductive biology of twelve species of neotropical malpighiaceae: Stigma morphology and its implications for the breeding system. *Ann Bot-London* 94(1): 33-41.
- Sigrist MR (1992) Fenologia, biologia flora, sistema de polinização e sistema reprodutivo de duas espécies simpátricas de *Dichorisandra* (Commelinaceae). Master's dissertation, State University of Campinas, Campinas.
- Silva CA, Vieira MF, Amaral CH (2010) Floral attributes, ornithophily and reproductive success of *Palicourea longepedunculata* (Rubiaceae), a distylous shrub in southeastern Brazil. *Rev Bras Bot* 33(2): 207-210.
- Siqueira Filho JA (2003) Fenologia da floração, ecologia da polinização e conservação de Bromeliaceae na Floresta Atlântica Nordeste. PhD thesis, Federal University of Pernambuco, Recife.
- Sobral-Leite M, Siqueira Filho JA, Erbar C, Machado IC (2011) Anthecology and reproductive system of *Mourera fluviatilis* (Podostemaceae): Pollination by bees and xenogamy in a predominantly anemophilous and autogamous family? *Aquat Bot* 95: 77-87.
- Teixeira LAG, Machado IC (2000) Sistema de Polinização e reprodução de *Byrsonima sericea* DC (Malpighiaceae). *Acta Bot Bras* 14(3): 347-357.
- Teixeira LAG, Machado IC (2004a) Biologia da polinização e sistema reprodutivo de *Psychotria barbiflora* DC. (Rubiaceae). *Acta Bot Bras* 18(4): 853-862.
- Teixeira LAG, Machado IC (2004b) *Sabicea cinerea* Aubl. (Rubiaceae): distilia e polinização em um fragmento de floresta Atlântica em Pernambuco. Nordeste do Brasil. *Rev Bras Bot* 27(1): 193-204.
- Teixeira LAG (2005) Mecanismos de polinização e sistema reprodutivo de espécies de Marantaceae da Estação Ecológica do Tapacurá, Pernambuco,

Nordeste do Brasil. PhD thesis, Federal University of Pernambuco, Recife.

Verçosa FC (2003) Fenologia e biologia reprodutiva de *Dyssochroma viridiflora* Miers var. *viridiflora* (Solanaceae). Master's dissertation, Federal University of Rio de Janeiro, Rio de Janeiro.

Vieira MF, Grabalos R (2003) Sistema reprodutivo de *Oxypetalum mexiae* Malme (Asclepiadaceae), espécie endêmica de Viçosa. MG. Brasil, em perigo de extinção. *Acta Bot Bras* 17(1): 137-145.

Vieira MF, Andrade MRS, Bittencourt NS, de Carvalho-Okano RM (2007) Flowering phenology, nectary structure and breeding system in *Corymborkis flava* (Spiranthoideae: Tropidieae), a terrestrial orchid from a Neotropical forest. *Aust J Bot* 55(6): 635-642.

Virillo CB, Ramos FN, Castro CC, Semir J (2007) Floral biology and breeding system of *Psychotria tenuinervis* Muell. Arg. (Rubiaceae) in the Atlantic rain forest. SE Brazil. *Acta Bot Bras* 21(4): 879-884.

Wolowski M, Freitas L (2010) Sistema reprodutivo e polinização de *Senna multijuga* (Fabaceae) em Mata Atlântica Montana. *Rodriguésia* 61(2): 167-179.

Wolowski M (2013) Sistema reprodutivo e limitação polínica em plantas da Floresta Atlântica com ênfase em polinização por beija-flores. PhD thesis, Rio de Janeiro.
